# Supplementary material for: Identification of the suprachiasmatic nucleus venous portal system in the mammalian brain
Source: PubMed Central journal article supplement (PMC8463669; doi:10.1038/s41467-021-25793-z), 2021-09-24
Supplement: 41467_2021_25793_MOESM3_ESM.pdf [file 41467_2021_25793_MOESM3_ESM.pdf]

## **Description of Additional Supplementary Files**

File Name: Supplementary Movie 1

Description: 3D visualization of the SCN – OVLT portal system in the sagittal orientation. SCN labelled with AVP, white; vasculature identified with type IV collagen, green; traces of vascular connection between SCN and OVLT, orange.
